# Supplementary material for: Cell cycle specific radiosensitisation by the disulfiram and copper complex
Source: PubMed Central journal article supplement (PMC5630381; doi:10.18632/oncotarget.19539), 2017-07-25
Supplement: oncotarget-08-65900-s001.pdf [file oncotarget-08-65900-s001.pdf]

## Cell cycle specific radiosensitisation by the disulfiram and copper complex

### SUPPLEMENTARY MATERIALS

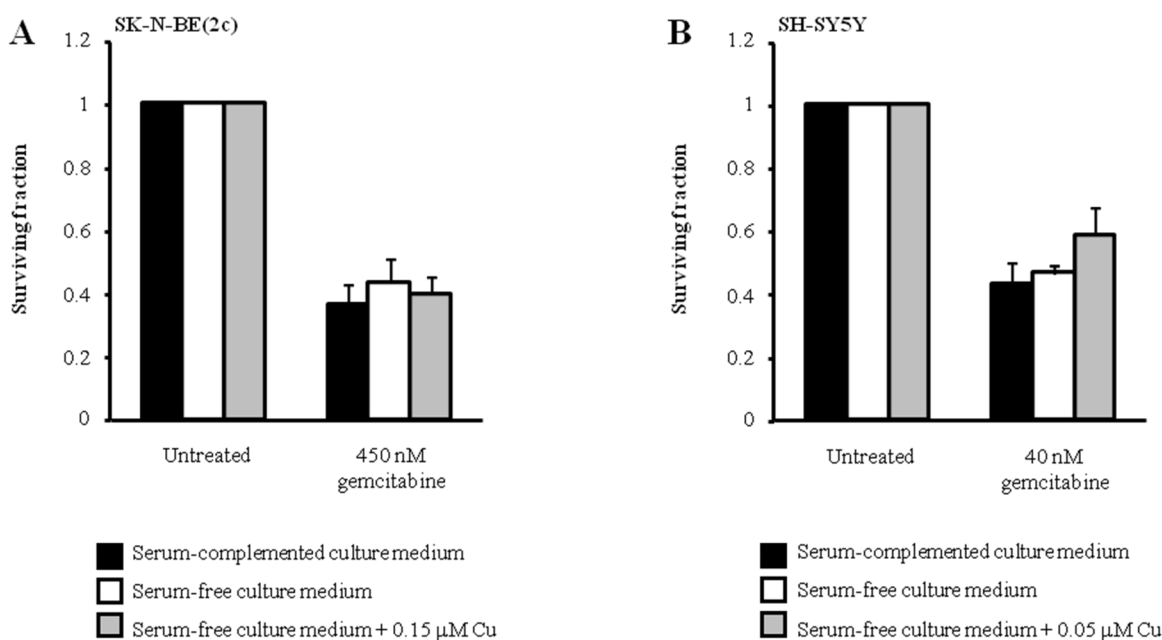

**Supplementary Figure 1: The effect of Cu on the clonogenic survival of SK-N-BE(2c) and UVW cells following treatment with gemcitabine.** (A) Unsynchronised SK-N-BE(2c) cells were exposed to 450 nM gemcitabine in serum-complemented culture medium, serum-free culture medium which does not contain Cu and in serum-free culture medium supplemented with 0.15  $\mu$ M Cu. (B) Unsynchronised SH-SY5Y cells were exposed to 40 nM gemcitabine in serum-complemented culture medium, serum-free culture medium which does not contain Cu and in serum-free culture medium supplemented with 0.05  $\mu$ M Cu. Data are means  $\pm$  SEM, n=3.

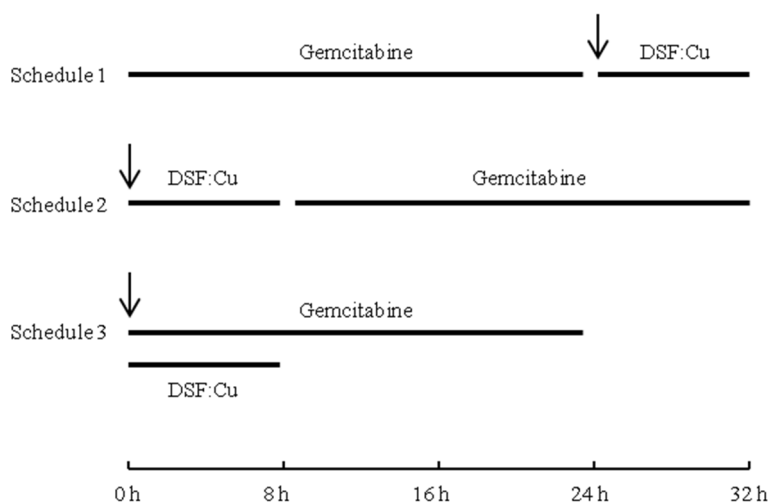

**Supplementary Figure 2: The treatment schedules consisting of gemcitabine, DSF:Cu and ionising radiation.** The arrows indicate the time of irradiation.
